# Supplementary material for: Water state, thermal transition behavior and structure of hydrated gelatin films
Source: Royal Society of Chemistry journal article supplement (doi:10.1039/d3sm01462b), 2024-01-01
Supplement: d3sm01462b1.pdf [file d3sm01462b1.pdf]

# Supporting Information

## **Water state, thermal transition behavior and structure of hydrated gelatin films**

Runpeng Liu<sup>1</sup>, Congde Qiao<sup>1\*</sup>, Qinze Liu<sup>1</sup>, Jinshui Yao<sup>1</sup>, Jing Xu<sup>2</sup>

*1. School of Materials Science and Engineering, Qilu University of Technology (Shandong Academy of Sciences), Jinan 250353, PR China*

*2. School of Chemistry and Chemical Engineering, Qilu University of Technology (Shandong Academy of Sciences), Jinan 250353, PR China*

Table S1. The glass transition temperature ( $T_g$ ), melt temperature ( $T_m$ ), enthalpy of melting ( $\Delta H_m$ ) and triple helix content ( $X$ ) of gelatin films with different water contents.

| Water content of gelatin films (%) | $T_g$ (°C)      | $T_m$ (°C)       | $\Delta H_m$ (J/g) | $X$ (%) |
|------------------------------------|-----------------|------------------|--------------------|---------|
| 4.9                                | $125.7 \pm 5.3$ | $153.5 \pm 8.5$  | 3.5                | 8       |
| 6.3                                | $110.1 \pm 3.8$ | $122.1 \pm 15.1$ | 3.9                | 8.8     |
| 8                                  | $87.2 \pm 1.1$  | $109.0 \pm 3.3$  | 11.3               | 25.7    |
| 11.4                               | $74.8 \pm 2.4$  | $107.0 \pm 0.4$  | 19.9               | 45.2    |
| 13.4                               | $63.3 \pm 2.6$  | $90.7 \pm 2.1$   | 23.5               | 53.4    |
| 17.7                               | $33 \pm 3$      | $69.1 \pm 0.1$   | 19.7               | 48.8    |
| 19.4                               | $29.6 \pm 1.6$  | $62.7 \pm 2.0$   | 4.5                | 10.2    |
| 25.8                               | $27.8 \pm 2.8$  | $48.3 \pm 0.9$   | 3.5                | 8       |
| 31.5                               | $24.8 \pm 1.8$  | $47.2 \pm 2.4$   | 3.3                | 7.6     |
| 40.9                               | $25.7 \pm 0.4$  | $44.6 \pm 5$     | 2.7                | 6.1     |
| 57.5                               | $26 \pm 2.6$    | $31.1 \pm 1.5$   | 2.6                | 6       |
| 113.2                              | $26 \pm 0.7$    | $30.1 \pm 1.9$   | 2.6                | 5.9     |

Table S2. Fitting parameters obtained from Fig. 1 by fitting with Eq. (2).

|         | $M_0$          | $C$             | $K$            | $R^2$  |
|---------|----------------|-----------------|----------------|--------|
| Gelatin | $13.9 \pm 2.5$ | $13.36 \pm 2.5$ | $0.44 \pm 0.1$ | 0.9916 |

Table S3. Mechanical properties of gelatin films with different water contents.

| Water content of gelatin films (%) | Strength (MPa) | Elongation (%) | E (MPa)    |
|------------------------------------|----------------|----------------|------------|
| 4.9%                               | 10.4 ± 1.5     | 1.2            | 8.0 ± 1.2  |
| 6.3%                               | 12.1 ± 0.1     | 4.8 ± 1.7      | 2.8 ± 1.1  |
| 8%                                 | 22.0 ± 1.6     | 2.9 ± 1.1      | 8.3 ± 3.3  |
| 11.4%                              | 26.8 ± 1.4     | 2.9 ± 0.1      | 9.2 ± 0.6  |
| 13.4%                              | 43.7 ± 2.4     | 4.0 ± 0.6      | 11.2 ± 1.9 |
| 17.7%                              | 25.7 ± 2.1     | 5.1 ± 1.2      | 5.2 ± 2.0  |
| 19.4%                              | 18.7 ± 0.8     | 47.1 ± 8.3     | 0.4 ± 0.1  |

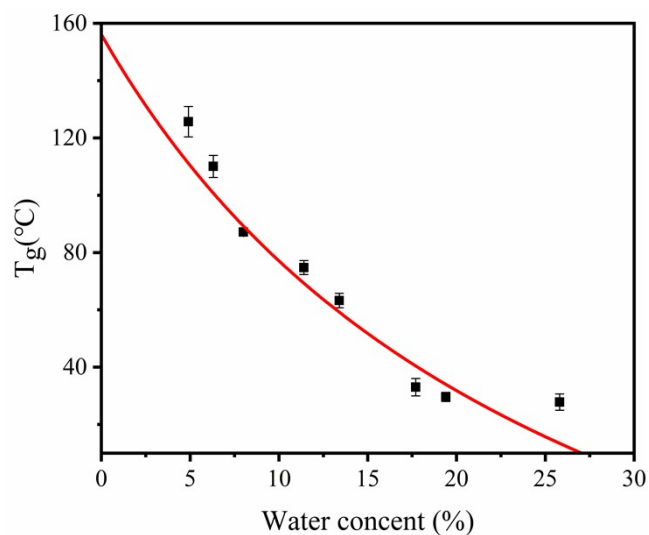

Figure S1. Variation in the glass transition temperature ( $T_g$ ) of gelatin films as a function of water content.

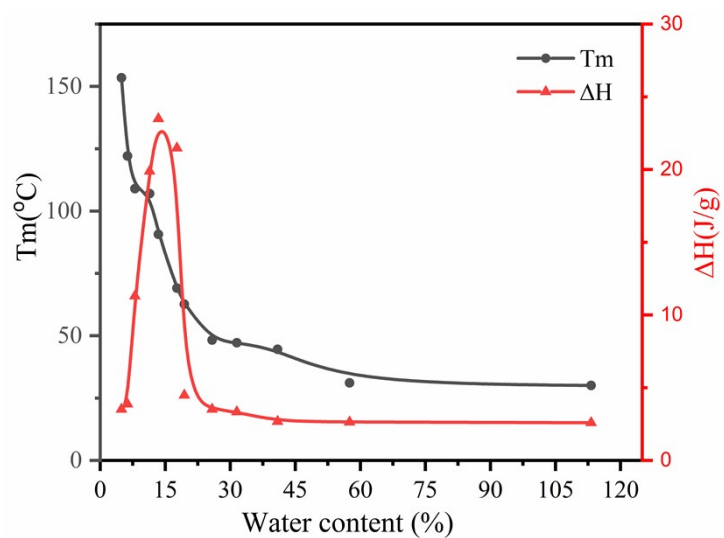

Figure S2. Melting temperature ( $T_m$ ) and melting enthalpy ( $\Delta H$ ) of gelatin films as a function of water content.

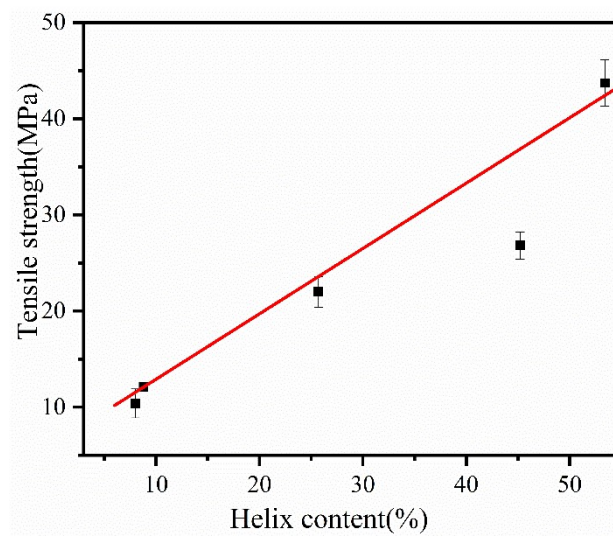

Figure S3. Tensile strength of gelatin films as a function of helix content.
